# Supplementary material
Source: Springer Nature journal article supplement (https://www.springermedizin.de/resource/supplementary/12889_2010_2688_MOESM5_ESM.pdf/9487070)
Supplement: MOESM5 [file 9487070]

A)

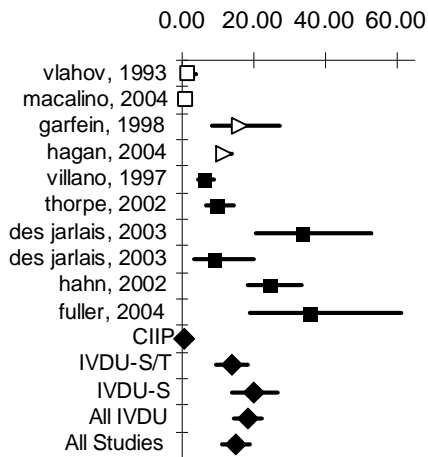

| Study Period | n/N     | Incidence                    | 95%CI        | Site         |
|--------------|---------|------------------------------|--------------|--------------|
| 1985 - 1987  | 2/164   | 1.10                         | 0.13, 3.97   | MD           |
| 1998 - 2000  | 2/446   | 0.40                         | 0.04, 1.31   | RI           |
| 1994 - 1996  | 13/105  | 16.00                        | 8.55, 27.44  | MD           |
| 1994 - 2001  | 134/484 | 11.60                        | 9.74, 13.76  | WA           |
| 1988 - 1996  | 43/142  | 6.40                         | 4.63, 8.62   | MD           |
| 1997 - 1999  | 29/353  | 10.00                        | 6.70, 14.36  | IL           |
| 1997 - 1999  | 19/76   | 34.00                        | 20.43, 52.98 | NY           |
| 1997 - 1999  | 6/65    | 9.30                         | 3.40, 20.15  | NY           |
| 2000 - 2001  | 48/195  | 25.10                        | 18.53, 33.32 | CA           |
| 2000 - 2003  | 13/62   | 35.90                        | 19.07, 61.24 | NY           |
|              |         | $I^2 = 99.9, \chi^2 < 0.001$ | 0.75         | 0.05, 1.44   |
|              |         | $I^2 = 99.9, \chi^2 < 0.001$ | 13.80        | 9.48, 18.11  |
|              |         | $I^2 = 99.9, \chi^2 < 0.001$ | 20.11        | 13.82, 26.41 |
|              |         | $I^2 = 99.9, \chi^2 < 0.001$ | 18.53        | 14.71, 22.35 |
|              |         | $I^2 = 99.9, \chi^2 < 0.001$ | 14.97        | 11.31, 18.62 |

B)

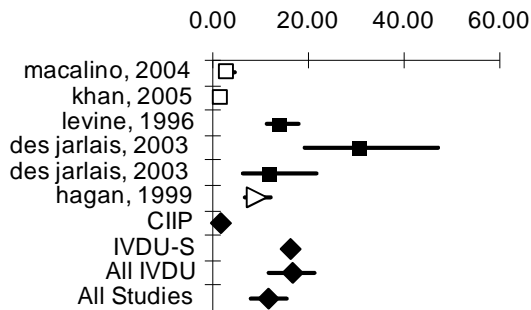

| Study Period | n/N    | Incidence                    | 95%CI        | Site         |
|--------------|--------|------------------------------|--------------|--------------|
| 1998 - 2000  | 15/446 | 2.70                         | 1.49, 4.38   | RI           |
| 2000 - 2001  | 18/503 | 1.28 <sup>a</sup>            | 0.76, 2.02   | GA           |
| 1988 - 1992  | 75/240 | 14.19                        | 11.16, 17.79 | MD           |
| 1997 - 1999  | 21/90  | 30.70                        | 19.00, 46.93 | NY           |
| 1997 - 1999  | 11/92  | 12.20                        | 6.10, 21.87  | NY           |
| 1994 - 1996  | 46/460 | 9.10                         | 6.65, 12.12  | WA           |
|              |        | $I^2 = 99.9, \chi^2 < 0.001$ | 1.71         | 1.62, 1.80   |
|              |        | $I^2 = 99.9, \chi^2 < 0.001$ | 16.06        | 15.86, 16.25 |
|              |        | $I^2 = 99.9, \chi^2 < 0.001$ | 16.54        | 11.71, 21.37 |
|              |        | $I^2 = 99.9, \chi^2 < 0.001$ | 11.69        | 7.93, 15.44  |
